# 1 **Predictors of Malaria Rapid Diagnostic Tests' Utilisation** 2 **Among Healthcare Workers in Zamfara State.**

3 **Usman Rabi<sup>1\*</sup>, Ahmad A. Umar<sup>2</sup>, Saheed Gidado<sup>1,3</sup>, A.A Gobir<sup>2</sup>, , Izuchukwu F. Obi<sup>1, 5</sup>,**  
4 **IkeOluwapo Ajayi<sup>4</sup>, Olufemi Ajumobi<sup>1,3</sup>**

5 1. Nigeria Field Epidemiology and Laboratory Training Programme, Abuja, Nigeria

6 2. Department of Community Medicine, Ahmadu Bello University, Zaria, Nigeria

7 3. African Field Epidemiology Network, Abuja, Nigeria

8 4. Department of Epidemiology and Medical Statistics, University of Ibadan, Ibadan,  
9 Nigeria

10 5. Department of Community Medicine, University of Nigeria Teaching Hospital Enugu,  
11 Nigeria

12

13 **\*Corresponding author:**

14 E-mail; [rabiuserman360@yahoo.com](mailto:rabiuserman360@yahoo.com)(RU)

## 15 **Abstract**

16 **Introduction:** Early diagnosis and prompt and effective treatment is one of the pillars of malaria  
17 control Malaria case management guidelines recommend diagnostic testing before treatment  
18 using malaria Rapid Diagnostic Test (mRDT) or microscopy and this was adopted in Nigeria in  
19 2010. However, despite the deployment of mRDT, the use of mRDTs by health workers varies  
20 by settings. This study set out to assess factors influencing utilisation of mRDT among  
21 healthcare workers in Zamfara State, Nigeria.

22 **Methods:** A cross-sectional study was carried out among 306 healthcare workers selected using  
23 multistage sampling from six Local Government Areas between January and February 2017.  
24 Mixed method was used for data collection. A pre-tested self-administered questionnaire was

25 used to collect information on knowledge, use of mRDT and factors influencing utilization. An  
26 observational checklist was used to assess the availability of mRDT in the six months prior to  
27 this study. Data were analyzed using descriptive statistics such as means and proportions.  
28 Association between mRDT use and independent variables was tested using Chi square while  
29 multiple regression was used to determine predictors of use at 5% level of significance.

30 **Results:** Mean age of respondents was  $36.0 \pm 9.4$  years. Overall, 198 (64.7%) of health workers  
31 had good knowledge of mRDT; malaria RDT was available in 33 (61.1%) facilities. Routine use  
32 of mRDT was reported by 253 (82.7%) healthcare workers. This comprised 89 (35.2%)  
33 laboratory scientists/technicians, 89 (35.2%) community health extension workers/community  
34 health officers; 59 (23.3%) nurses and 16 (6.3%) doctors. Predictors of mRDT utilisation were  
35 good knowledge of mRDT (adjusted OR (aOR):3.3, CI: 1.6-6.7), trust in mRDT results (aOR:  
36 4.0, CI: 1.9 - 8.2), having being trained on mRDT (aOR: 2.7, CI: 1.2 - 6.6), and provision of free  
37 mRDT (aOR: 2.3, CI: 1.0 - 5.0).

38 **Conclusion:** This study demonstrated that healthcare worker utilisation of mRDT was associated  
39 with health worker and health system-related factors that are potentially modifiable. There is  
40 need to sustain training of healthcare workers on benefits of using mRDT and provision of free  
41 mRDT in health facilities.

42 **Keywords:** Malaria rapid diagnostic test, knowledge, utilisation, healthcare worker, Nigeria

43

44

45

46

## 48 **Introduction**

49 Malaria remains a major public health problem in many countries of the world. Despite the  
50 progressive reduction in malaria cases and deaths, it is estimated that an estimated 216 million  
51 cases of malaria occurred worldwide in 2016 with 90% from the African region.<sup>1</sup> Fifteen  
52 countries accounted for 80% of the 445,000 malaria deaths worldwide; these countries are all in  
53 sub-Saharan Africa which include Nigeria<sup>1</sup>.

54 In 2016, Nigeria accounted for more than 50% of all malaria cases in sub-Saharan Africa<sup>1</sup>; the  
55 disease is responsible for two-thirds of outpatient visits to health facilities, one-third of childhood  
56 deaths, one-quarter of deaths in children under one year and 11% maternal deaths. The financial  
57 loss due to malaria annually is estimated to be about 132 billion naira in form of treatment costs,  
58 prevention and loss of man-hours among others; yet, it is a treatable and preventable disease<sup>2</sup>.  
59 Malaria prevalence in Zamfara State has remained consistently high, 69.9%<sup>3</sup> with less than one  
60 percent of children with fever being tested for malaria<sup>4</sup>.

61 The WHO in 2010, recommended confirmation of malaria in febrile illness prior to treatment  
62 with artemisinin combination therapy<sup>5</sup>. Attaining the objective of test and treat for all suspected  
63 malaria cases using RDT or microscopy<sup>6</sup> make it imperative for all health workers to have access  
64 to, and appropriately utilize malaria diagnostic tools. Although microscopy is recognized as the  
65 gold standard in malaria diagnosis, it has been limited in availability, often of poor quality, time-  
66 consuming, labor-intensive, and costly<sup>7,8</sup> especially in resource-poor settings. Lack of equipment,  
67 reagents, and expertise for malaria microscopy in the majority of peripheral health centers and  
68 the constant power supply has equally limited its use. More so, presumptive diagnosis based on  
69 malaria symptoms has proven to be unspecific<sup>9-11</sup>. These shortcomings of microscopy and

70 presumptive diagnosis have favored the deployment and use of mRDTs which have been found  
71 to be cost-effective<sup>12-14</sup> and allow diagnosis even in health settings lacking any laboratory  
72 facility. Malaria RDT use is expected to not only improve malaria management but also limit  
73 malaria treatment costs<sup>15</sup>. Deployment to mRDT to health facilities commenced in Nigeria in the  
74 year 2007.

75 Factors such as heavy workload, lack of trust, cost, training on the use of RDTs have been  
76 considered to influence RDT use<sup>16-21</sup>. A study reported a high proportion (61.5%) of healthcare  
77 workers perceived mRDTs as unreliable, one-third (30.8%) of healthcare workers had supply  
78 issues with mRDT, 15.4% of them reported a preference for other methods of malaria diagnosis  
79 and one-fifth (26%) of healthcare workers were ignorant about mRDT.<sup>16</sup> These factors are  
80 generic and may vary in different settings.

81 There is a paucity of data concerning the mRDT use and factors influencing utilisation among  
82 healthcare workers in Zamfara State. Lack of malaria testing could impair the ability of health  
83 workers to make informed and prompt treatment decision based on parasitological diagnosis<sup>5</sup>.  
84 This study aimed to investigate the knowledge of mRDT, mRDT availability and use as well as  
85 factors influencing mRDT utilisation in health facilities in Zamfara State.

86

87

88

89

90

91

92

## 93 **Methods**

### 94 **Study area**

95 The study was conducted in Zamfara State, North West Nigeria. The State has a projected  
96 population of 4,466,775 (based on the 2006 Census population with an annual growth rate of  
97 3.2%). The climate of Zamfara is tropical with a temperature rising up to 38 °C (100.4 °F) and  
98 above between March to May. The state experiences malaria transmission all year-round with  
99 peak transmission during the rainy season between May and September. The State operates a  
100 three-tier healthcare delivery services namely primary, secondary (General Hospitals) and  
101 tertiary spread across urban and rural areas. The State has a total of 712 health facilities  
102 distributed across 14 Local Government Areas (LGAs). These health facilities are as follows; 71  
103 Primary Health Centres, 607 Health Clinics, 10 private hospitals, 22 General Hospitals, 1  
104 Specialist Hospital and 1 Federal Medical Center. The State has a total of 3,458 healthcare  
105 workers working in these health facilities. Majority of the facilities in the State offer malaria  
106 diagnosis and treatment services<sup>22</sup>. Generally, trained staff of public primary health centers offer  
107 malaria diagnosis using mRDT while trained laboratory scientists at public general hospitals  
108 (secondary care level) offer both malaria microscopy and mRDT services. The State has  
109 benefitted from several Malaria intervention programs over the years such as Partnership for  
110 Reviving Routine Immunization in Northern Nigeria- Maternal and Neonatal Child Health  
111 (PRRINN/MNCH), Malaria Action Program for States (MAPS) and of recent, the STOP/Malaria  
112 Frontline project to improve the effectiveness of malaria control in Zamfara State. A cross-  
113 sectional study was carried out among health workers. in public health facilities in the state  
114 between January and February 2017.

## 115 **Sample size and sampling technique**

116 A sample size of 306 was calculated using sample size formula for single proportion;

$$117 \quad n = \frac{Z_{\alpha}^2 pq}{d^2}$$

118

119 Where:

120 the p= proportion of health workers that use malaria RDT to diagnose malaria in public health  
121 facilities, (0.85)<sup>23</sup>

122 q= 1-p= 1-0.852= 0.148

123 d= level of precision, 0.05

124  $\alpha$  = level of significance, 5%

125  $Z_{\alpha}$ = standard normal deviate, 1.96

126 A three-stage sampling technique was used to select study respondents. Two (2) LGAs were  
127 randomly selected by balloting from each of the three senatorial zones of the State giving a total  
128 of 6 LGAs namely; Kaura Namoda and Zurmi LGAs (Zamfara North zone), Gusau and Bungudu  
129 LGAs (Zamfara Central zone), Anka and Talata Mafara LGAs (Zamfara West zone). List of all  
130 public health facilities from the selected LGAs based on the level of care was stratified into  
131 primary and secondary facilities. Eight Primary Health Care centers (PHCs) were selected from  
132 each of the selected LGA by balloting giving a total of 48 PHCs while the General hospital in  
133 each of the LGA selected was purposively selected for the study. However, where there was  
134 more than one General Hospital in a selected LGA, one was selected by balloting. This gave an  
135 overall total of 54 health facilities selected for the study. A sampling frame of all healthcare

136 workers was developed using the facility's nominal roll. Health workers were selected by  
137 stratified sampling proportionate to size until required sample size was obtained.

### 138 **Data collection**

139 Six trained research assistants distributed the questionnaires. Semi-structured self- administered  
140 questionnaires were used to obtain information on respondents' socio-demographic  
141 characteristics, knowledge of mRDT, malaria diagnostic methods used in health facilities,  
142 utilization of malaria RDT among health care workers, training on malaria case management,  
143 supervision on malaria RDT use and factors affecting malaria RDT utilization. The research  
144 assistants administered health facility observational checklists to assess the availability of  
145 mRDTs at the facilities within the last six months.

### 146 **Data processing and analysis**

147 Questionnaires were manually checked for completeness and consistency with corrections made  
148 daily. Data were entered, cleaned and analyzed using Epi-info Version 7. Data were summarized  
149 using descriptive statistics such as means and standard deviations for quantitative variables such  
150 as age, years of practice and knowledge score while frequencies and proportions were generated  
151 for categorical variables (the cadre of health worker, the proportion of febrile patients who get  
152 tested using mRDT, mRDT availability, and mRDT use). Results of the analysis were presented  
153 in tables and charts. Healthcare workers' mRDT knowledge scores were calculated thus; 8  
154 questions evaluated knowledge of mRDT, each correct answer was given a score of 1 and an  
155 incorrect answer was given a score of 0. Total scores were computed for each respondent and  
156 converted into percentages. A score of less than 50% was graded as poor knowledge, between  
157 50% and 75% as fair knowledge and greater than 75% as good knowledge. Bivariate analysis  
158 was used to test the association between categorical dependent and independent variables. Those

159 significant at p-value  $\leq 5\%$  were put in the logistic regression model to control for confounders  
160 to determine predictors of mRDTs by healthcare workers. Odds Ratios and 95% Confidence  
161 Intervals (CIs) were presented.

## 162 **Ethical considerations**

163 This research was granted ethical approval by the Ethics and Research Committee of Zamfara  
164 State Ministry of Health (Reference number- ZSHREC/03/10/2016). Participation was voluntary  
165 and written informed consent was obtained from all respondents. The participants were not at  
166 any point in time exposed to harm and were free to opt out at any time during the interview.  
167 Confidentiality of collected information was maintained by using unique non-personal identifier  
168 codes for the respondents. The completed questionnaire was kept under lock and key.

## 169 **Results**

### 170 **Characteristics of respondents**

171 Overall, 306 healthcare workers participated in the study and their mean age was 36.0yrs, SD:  
172 9.4yrs. Most, 128 (41.8%), of the respondents were aged 25 to 34years. They were mostly males,  
173 204 (66.7%). CHEWs represented 105 (34.3%) of respondents and 21 (6.9%) were doctors. Most  
174 were married (78.1%, n = 239). The average duration of practice was  $11.0 \pm 9.1$ yrs (Table 1).

175

176

177

178



179 **Table 1: Frequency distribution of socio-demographic characteristics of the respondents**  
180 **(N = 306)**

181

| <b>Characteristics</b>                | <b>Frequency (%)</b> |
|---------------------------------------|----------------------|
| <b>Age group (in years)</b>           |                      |
| <25                                   | 22 (7.2)             |
| 25-34                                 | 128 (41.8)           |
| 35-44                                 | 90 (29.4)            |
| 45-54                                 | 54 (17.7)            |
| ≥55                                   | 12 (3.9)             |
| <b>Sex</b>                            |                      |
| Male                                  | 204 (66.7)           |
| <b>The cadre of healthcare worker</b> |                      |
| Doctor                                | 21 (6.9)             |
| Nurse/Midwife                         | 83 (27.1)            |
| Laboratory Scientist/Technician       | 97 (31.0)            |
| CHEW/CHO                              | 105 (34.3)           |
| <b>Marital Status</b>                 |                      |
| Single                                | 63 (20.6)            |
| Married                               | 239 (78.1)           |
| Widowed                               | 4 (1.3)              |
| <b>Duration of practice (years)</b>   |                      |
| 1-5                                   | 95 (31.1)            |
| 6-10                                  | 95 (31.1)            |
| 11-15                                 | 47 (15.4)            |
| 16-20                                 | 23 (7.5)             |
| 21-25                                 | 8 (2.6)              |
| >25                                   | 38 (12.4)            |

182

183

184

185

186

187

## 188 **Health workers' knowledge of mRDT**

189 Among the 306 health workers, 245 (80.1%) knew the meaning of mRDT, while 236 (77.0 %)  
190 knew what mRDT assesses. All the respondents, 306 (100%) knew that blood was used for the  
191 test. Two hundred and eighty-two (92.0%) knew how to carry out mRDT. Mean knowledge  
192 score for respondents was 82.0 (standard deviation (SD): 15.8). Overall, more than half of  
193 respondents (64.7%, n = 198) had good knowledge of mRDT. According to cadre, 71.1% of  
194 laboratory scientists/technicians, 63.8% of CHEWs/CHOs, 61.9% of doctors and 59.0% nurses  
195 had good knowledge of malaria RDT. (Table 2).

196

197

198

199

200

201

202

203

204

205

206

207 **Table 2: Level of knowledge of malaria Rapid Diagnostic Test by Professional Cadre of**  
 208 **Respondents in Selected Health Facilities, Zamfara State**

| Professional cadre        | Knowledge grade |      |                |      |               |      | Total<br>N = 306 |
|---------------------------|-----------------|------|----------------|------|---------------|------|------------------|
|                           | Good<br>N = 198 |      | Fair<br>N = 99 |      | Poor<br>N = 9 |      |                  |
|                           | Frequency       | %    | Frequency      | %    | Frequency     | %    |                  |
| Doctors                   | 13              | 61.9 | 4              | 19.1 | 4             | 19.1 | 21               |
| Nurse/Midwife             | 49              | 59.0 | 32             | 38.6 | 2             | 2.4  | 83               |
| CHEW/CHO                  | 67              | 63.8 | 36             | 34.3 | 2             | 1.9  | 105              |
| Lab. Scientist/Technician | 69              | 71.1 | 27             | 27.8 | 1             | 1.0  | 97               |

209

210

211

212

213

214

215

216

217

218

219

220

221

222 **Availability and use of mRDT among healthcare workers**

223 Thirty-three (61.1%) out of the 54 of health facilities had mRDT in stock. Overall, 253 (82.7%)  
224 of the healthcare workers reported using malaria RDT routinely before making a diagnosis of  
225 malaria. This comprised 89 (35.2%) laboratory scientists/technicians, 89 (35.2%) community  
226 health extension workers/community health officers; 59 (23.3%) nurses and 16 (6.3%) doctors.  
227 Nurses/Midwives (OR: 2.7, 95% CI: 1.5 – 5.0) and Laboratory scientists/technicians (OR: 3.1,  
228 95% CI: 1.4 – 6.8) were significantly more likely to use mRDT compared to doctors and  
229 CHEWs/CHOs (Table 3).

230

231

232

233

234

235

236

237

238

239

240 **Table 3: Utilisation OF Malaria Rapid Diagnostic Test Among Healthcare Workers in**  
241 **Selected Health Facilities, Zamfara State (N=253)**

| <b>Professional cadre</b> | <b>n (%)</b> | <b>OR (95%CI)</b> | <b>p-value</b> |
|---------------------------|--------------|-------------------|----------------|
| Doctor                    | 16 (6.3)     | 1.5 (0.5 - 4.4)   | 0.606          |
| Nurse/Midwife             | 59 (23.3)    | 2.7 (1.5 - 5.0)   | 0.002          |
| CHEW/CHO                  | 89 (35.2)    | 0.8 (0.4 - 1.5)   | 0.592          |
| Lab. Scientist/Technician | 89 (35.2)    | 3.1 (1.4 - 6.8)   | 0.007          |

242

243

244

245

246

247

248

249

250

251

252 **Factors influencing mRDT use**

253 Healthcare workers with good knowledge of mRDT were 2.7 times more likely to use it (p =  
254 0.002). Those who have had training in malaria case management had 2.4 times odds of using  
255 mRDT (p = 0.003). Healthcare workers in facilities that do mRDT for free were 2.8 times more  
256 likely to use it (p = 0.036) compared to facilities where patients have to pay for it. Healthcare  
257 workers who have trust in mRDT, have had training on mRDT and those who have received  
258 supportive supervision ((p = 0.002) were 3 times more likely to use mRDT compared to those  
259 who did not have training and did not receive supportive supervision. Predictors of mRDT  
260 utilisation include health workers' having good knowledge of mRDT (aOR: 3.3, 95% CI: 1.6 –  
261 6.7), trust in mRDT results, (aOR: 4.0, 95% CI: 2.0 – 8.3), training on mRDT (aOR: 2.8, 95%  
262 CI: 1.2 – 6.7) and provision of free mRDT (aOR: 2.3, 95% CI: 1.0 – 5.0), Table 4.

263 **Table 4: Association between respondents' factors, health system factors, and utilization of malaria Rapid Diagnostic Test,**  
 264 **Zamfara**

| <b>Characteristic</b>                                       | <b>Crude OR</b> | <b>p-value</b> | <b>aOR</b>      | <b>p-value</b> |
|-------------------------------------------------------------|-----------------|----------------|-----------------|----------------|
| <b>Age (in years)</b>                                       |                 |                |                 |                |
| <36                                                         | 1.5 (0.5 – 1.7) | 0.9798         |                 |                |
| >36                                                         |                 |                |                 |                |
| <b>Sex</b>                                                  |                 |                |                 |                |
| Male                                                        | 2.5 (1.4 – 4.5) | 0.0046         |                 |                |
| <b>Professional cadre</b>                                   |                 |                |                 |                |
| Doctor                                                      | 1.5 (0.5 – 4.4) | 0.6062         |                 |                |
| Nurse/Midwife                                               | 2.7 (1.5 – 5.0) | 0.0019         |                 |                |
| CHEW/CHO                                                    | 0.8 (0.4 – 1.5) | 0.5916         |                 |                |
| Lab. Scientist/Technician                                   | 3.1 (1.4 – 6.8) | 0.0070         |                 |                |
| <b>Duration of practice (in years)</b>                      |                 |                |                 |                |
| <15                                                         | 1.0 (0.5 – 1.8) | 0.9496         |                 |                |
| ≥15                                                         |                 |                |                 |                |
| <b>Knowledge of mRDT</b>                                    |                 |                |                 |                |
| Good knowledge                                              | 2.7 (1.5 – 4.9) | 0.0020         | 3.3 (1.7 – 6.7) | <0.001         |
| Poor knowledge                                              |                 |                |                 |                |
| <b>Training on Malaria case management</b>                  |                 |                |                 |                |
| Trained                                                     | 2.4 (1.7 – 6.0) | 0.0003         |                 |                |
| Not trained                                                 |                 |                |                 |                |
| <b>Trust in mRDT result</b>                                 |                 |                |                 |                |
| Trust results                                               | 3.2 (1.7 – 6.0) | 0.0070         | 4.0 (2.0 – 8.3) | <0.001         |
| Do not trust results                                        |                 |                |                 |                |
| <b>Had training on mRDT in the last 6 months</b>            |                 |                |                 |                |
| Trained                                                     | 3.4 (1.7 – 6.6) | 0.0003         | 2.8 (1.2 – 6.7) | 0.040          |
| Not trained                                                 |                 |                |                 |                |
| <b>Received supportive supervision in the last 6 months</b> |                 |                |                 |                |
| Supervised                                                  | 3.2 (1.8 – 5.9) | 0.0002         |                 |                |
| Not supervised                                              |                 |                |                 |                |
| <b>mRDT availability</b>                                    |                 |                |                 |                |
| Available                                                   | 1.7 (0.6 – 4.8) | 0.7917         |                 |                |
| Not available                                               |                 |                |                 |                |
| <b>Cost of mRDT</b>                                         |                 |                |                 |                |
| Free                                                        | 2.8 (1.2 – 6.6) | 0.0363         | 2.3 (1.0 – 5.0) | 0.040          |
| Not free                                                    |                 |                |                 |                |

## 266 **Discussion**

267 The study showed that healthcare workers have good knowledge of mRDT similar to a study  
268 conducted in Southeast Nigeria where 61.1% of respondents knew about mRDT.<sup>24</sup> The  
269 proportion of healthcare workers who knew the meaning of mRDT was found to be higher than  
270 that in a study carried out in the six geo-political zones of Nigeria where 70% reported knowing  
271 the meaning of mRDT<sup>21</sup>. This is probably because of investment by government and non-  
272 governmental organizations in awareness creation on parasitological testing through training on  
273 mRDT<sup>21</sup> in Zamfara state.

274 Majority of healthcare workers used malaria RDT routinely before making a diagnosis of  
275 malaria. This finding is similar to a study in Ogun State<sup>25</sup> and systematic review of mRDT use  
276 in sub-Saharan Africa that reported a high percentage of healthcare workers used mRDT prior to  
277 administration of ACTs. However, a previous study found that doctors and laboratory  
278 technicians more likely to use mRDT compared to nurses and CHEWs/CHOs<sup>24</sup>. High use of  
279 mRDT among laboratory scientists is not surprising as their primary responsibility is to carry out  
280 tests.

281 It is widely established that the key factor in improving diagnosis of malaria is the availability of  
282 mRDTs in health facilities.<sup>26</sup> This study found that rapid diagnostic test kits were available in  
283 more than half of health facilities, higher than what was reported in a study in Enugu State  
284 where 31% of health facilities had mRDT<sup>17</sup> and another study in Ogun State that reported mRDT  
285 was available in 50.7% of health facilities<sup>25</sup>. This, however, is less than the WHO average  
286 availability target in public and private health facilities as availability is said to be inadequate if it  
287 falls below 80%. This finding underscores the need to scale-up mRDTs availability in health



288 facilities in the State since currently, mRDTs are supplied free of charge by the government to  
289 only public health facilities. Widespread provision of malaria RDTs will play a significant role in  
290 reducing the persistent problem of malaria over-diagnosis and contribute to reduced risk of  
291 malaria under-treatment. Factors that were found to influence mRDT use in this study are similar  
292 to those found in previous studies that have reported that trust, training, and cost of mRDT affect  
293 its use<sup>16-21</sup>. Positive influence of healthcare workers' trust in mRDT use in this study differs from  
294 a previous study that reported low use of mRDT despite availability because they do not trust the  
295 results<sup>24</sup>. This is probably because the study was conducted during the early stage of introducing  
296 mRDT into the country compared to the present day where awareness and training on mRDT  
297 have improved.

298 Another factor influencing mRDT utilization found in this study was training. This is similar to  
299 previous studies that showed that training of healthcare workers on mRDT improves healthcare  
300 workers' performance with an increased likelihood of adherence to malaria treatment  
301 guidelines.<sup>28-30</sup> This study also found that healthcare workers are more likely to use mRDT if the  
302 cost is free. This is similar to a previous study that reported a large improvement in the  
303 proportion of patients appropriately treated at a low cost with the introduction of mRDTs<sup>5</sup>. A  
304 possible reason for this is the fact that patients won't incur any cost if they are asked to do mRDT  
305 since it is free. This, in turn, will encourage its use in health facilities, thereby, increasing the  
306 proportion of patients with the parasitological diagnosis.

### 307 **Limitations**

308 The questionnaire captured self-reported information, hence relied primarily on respondents  
309 providing the right information. There might have been some reporting bias with probably the  
310 tendency to overestimate utilization of mRDTs in this study since this is a desirable outcome.

311 However, this was minimized by ensuring that participants were assured of a high degree of  
312 confidentiality.

## 313 **Conclusion**

314 The high proportion of health workers with good knowledge of mRDT in Zamfara state is  
315 commendable and could be reflection of the training that has been held in the state by multiple  
316 agents in the past. This also influenced the high use of the diagnostic kit. The drivers of mRDT  
317 use in this study (knowledge, trust, training, and provision of free mRDTs) are plausible and a  
318 good index to inform intensified efforts at capacity building of healthcare workers. The  
319 government and collaborating partners with interest in malaria control should, therefore, sustain  
320 the training of healthcare workers on mRDT and supply of free mRDTs in the health facilities in  
321 Zamfara state and the country as a whole.

## 322 **Acknowledgements**

323 We thank the participating medical staff of all health institutions visited and the research  
324 assistants. We are grateful to the Nigeria Field Epidemiology and Laboratory Training  
325 Programme (NFELTP) for the support provided for this research. This study was supported by  
326 Cooperative Agreement Number U2GGH001876 funded by the United States Centers for  
327 Disease Control and Prevention through African Field Epidemiology Network to NFELTP. Its  
328 contents are solely the responsibility of the authors and do not necessarily represent the official  
329 views of the United States Centers for Disease Control and Prevention or the Department of  
330 Health and Human Services.

331 **Author's contributions:** RU and SG conceptualised the study. AAU and OA contributed to  
332 design of the study and the data tools. RU designed the study, performed the field work, data  
333 analysis and interpretation and wrote the draft manuscript. AAU, AAG, IFO, IA and OA  
334 contributed to data interpretation and provided technical inputs during the manuscript writing.

335 **Competing interests:** The authors have declared that no competing interests exist.

336

337

## 339 **References**

- 340 1. WHO. World Malaria Report 2017 [Internet]. World Health Organization. 2017. 186 p.  
341 Available from: [http://apps.who.int/iris/bitstream/handle/10665/259492/9789241565523-](http://apps.who.int/iris/bitstream/handle/10665/259492/9789241565523-eng.pdf;jsessionid=3B05B30235850B2B29A7FFFDD8A874D8?sequence=1)  
342 [eng.pdf;jsessionid=3B05B30235850B2B29A7FFFDD8A874D8?sequence=1](http://apps.who.int/iris/bitstream/handle/10665/259492/9789241565523-eng.pdf;jsessionid=3B05B30235850B2B29A7FFFDD8A874D8?sequence=1)
- 343 2. Plan S. Federal Ministry of Health , National Malaria Control Programme , Abuja ,  
344 Nigeria . Strategic Plan 2009-2013 A Road Map for Malaria Control in Nigeria DRAFT  
345 16 June 2008. 2013;(June 2008):1–39.
- 346 3. Nigeria Malaria Indicator Survey 2015 - Key Indicators Report [PR70] - PR70.pdf  
347 [Internet]. 2015. Available from: <http://dhsprogram.com/pubs/pdf/PR70/PR70.pdf>
- 348 4. NPC, ICF. Nigeria Demographic and Health Survey 2013. Natl Popul Comm [Internet].  
349 2014 [cited 2016 Oct 25];566. Available from:  
350 [http://scholar.google.com/scholar?hl=en&btnG=Search&q=intitle:Nigeria+Demographic+](http://scholar.google.com/scholar?hl=en&btnG=Search&q=intitle:Nigeria+Demographic+and+Health+Survey#0%5Cnhttp://scholar.google.com/scholar?hl=en&btnG=Search&q=intitle:Nigeria+demographic+and+health+survey+1999#0)  
351 [and+Health+Survey#0%5Cnhttp://scholar.google.com/scholar?hl=en&btnG=Search&q=i](http://scholar.google.com/scholar?hl=en&btnG=Search&q=intitle:Nigeria+demographic+and+health+survey+1999#0)  
352 [ntitle:Nigeria+demographic+and+health+survey+1999#0](http://scholar.google.com/scholar?hl=en&btnG=Search&q=intitle:Nigeria+demographic+and+health+survey+1999#0)
- 353 5. Ajumobi O, Sabitu K, Ajayi I, Nguku P, Ufere J, Wasswa P, et al. Demand-related factors  
354 influencing caregivers' awareness of malaria tests and health workers' testing practices, in  
355 Makarfi, Nigeria. *Malar J* [Internet]. 2017;16(1):1–9. Available from:  
356 <https://doi.org/10.1186/s12936-017-2138-8>
- 357 6. FMOH. National malaria strategic plan 2014–2020. . Abuja, Nigeria: Federal Ministry of  
358 Health; 2014.
- 359 7. Hamer DH, Ndhlovu M, Zurovac D, Fox M, Yeboah-Antwi K, Chanda P, et al. Improved  
360 diagnostic testing and malaria treatment practices in Zambia. *JAMA*. May 23.  
361 2007;297(20):2227–2231.
- 362 8. Bruxvoort K, Kalolella A, Nchimbi H, Festo C, Taylor M, Thomson R, et al. Getting  
363 antimalarials on target : impact of national roll-out of malaria rapid diagnostic tests on  
364 health facility treatment in three regions of Tanzania. 2013;18(10):1269–82.
- 365 9. Mens P, Spieker N, Omar S, Heijnen M, Schallig H, Kager PA. Is molecular biology the  
366 best alternative for diagnosis of malaria to microscopy? A comparison between  
367 microscopy, antigen detection and molecular tests in rural Kenya and urban Tanzania.  
368 *Trop Med Int Heal*. 12(2):238–244.
- 369 10. Chandramohan D, Jaffar S, Greenwood B. Use of clinical algorithms for diagnosing  
370 malaria. *Trop Med Int Heal*. 2002 Jan. 2002;7(1):45–52.
- 371 11. Källander K, Nsungwa-Sabiiti J, Peterson S. Symptom overlap for malaria and  
372 pneumonia--policy implications for home management strategies. *Acta Trop*.  
373 2004;90(2):211–4.
- 374 12. Lubell Y, Reyburn H, Mbakilwa H, Mwangi R, Chonya S, Whitty CJM, et al. The impact

- 375 of response to the results of diagnostic tests for malaria: cost-benefit analysis. *BMJ*.
- 376 13. Shillcutt S, Morel C, Goodman C, Coleman P, Bell D, Whitty CJM, et al. Cost-  
377 effectiveness of malaria diagnostic methods in sub-Saharan Africa in an era of  
378 combination therapy. *Bull World Health Organ*. 28 November. 86(2).
- 379 14. Uzochukwu BSC, Obikeze EN, Onwujekwe OE, Onoka C a, Griffiths UK. Cost-  
380 effectiveness analysis of rapid diagnostic test, microscopy and syndromic approach in the  
381 diagnosis of malaria in Nigeria: implications for scaling-up deployment of ACT. *Malar J*.  
382 2009;8:265.
- 383 15. Bisoffi Z, Gobbi F, Angheben A, Ende J Van den. The Role of Rapid Diagnostic Tests in  
384 Managing Malaria. *PLoS Med* [Internet]. 2009;6(4). Available from:  
385 <http://www.plosmedicine.org>
- 386 16. Onwujekwe O, Uzochukwu B, Dike N, Uguru N, Nwobi E, Shu E. Malaria treatment  
387 perceptions, practices and influences on provider behaviour: comparing hospitals and non-  
388 hospitals in south-east Nigeria. *Malar J*. 2009;8:246.
- 389 17. Uzochukwu BSC, Chiegboka LO, Enwereuzo C, Okorafor D, Onwujekwe OE, Uguru NP,  
390 et al. Examining appropriate diagnosis and treatment of malaria: availability and use of  
391 rapid diagnostic tests and artemisinin-based combination therapy in public and private  
392 health facilities in southeast Nigeria. *BMC Public Health*. 2010;10(486).
- 393 18. Ansah EK, Narh-Bana S, Epokor M, Akanpigbiam S, Quartey AA, Gyapong J, et al.  
394 Rapid testing for malaria in settings where microscopy is available and peripheral clinics  
395 where only presumptive treatment is available: a randomised controlled trial in Ghana.  
396 *BMJ* [Internet]. 2010;340(mar05\_1):c930. Available from:  
397 <http://www.bmj.com/content/340/bmj.c930>
- 398 19. Chandler CIR, Whitty CJM, Ansah EK. How can malaria rapid diagnostic tests achieve  
399 their potential? A qualitative study of a trial at health facilities in Ghana. *Malar J*  
400 [Internet]. 2010;9:95. Available from:  
401 [http://www.pubmedcentral.nih.gov/articlerender.fcgi?artid=2859355&tool=pmcentrez&re](http://www.pubmedcentral.nih.gov/articlerender.fcgi?artid=2859355&tool=pmcentrez&rendertype=abstract)  
402 [ndertype=abstract](http://www.pubmedcentral.nih.gov/articlerender.fcgi?artid=2859355&tool=pmcentrez&rendertype=abstract)
- 403 20. Mubi M, Kakoko D, Ngasala B, Premji Z, Peterson S, Björkman A, et al. Malaria  
404 diagnosis and treatment practices following introduction of rapid diagnostic tests in  
405 Kibaha District, Coast Region, Tanzania. *Malar J*. 2013;12(293).
- 406 21. Mokuolu OA, Okafor HU, FA O, CO A, KU E, TO F, et al. Status of the use and  
407 compliance with malaria rapid diagnostic tests in formal private health facilities in  
408 Nigeria. *Malar J*. 2016;15:4.
- 409 22. Reviewed ZAMFARA STATE 2015 ANNUAL OPERATIONAL PLAN FOR  
410 MALARIA CONTROL.
- 411 23. Bamiselu OF, Ajayi I, Fawole O, Dairo D, Ajumobi O, Oladimeji A, et al. Adherence to  
412 malaria diagnosis and treatment guidelines among healthcare workers in Ogun State ,

- 413 Nigeria. BMC Public Health [Internet]. 2016;1–10. Available from:  
414 <http://dx.doi.org/10.1186/s12889-016-3495-x>
- 415 24. Uzochukwu BSC, Chiegboka LO, Enwereuzo C, Nwosu U, Okorafor D, Onwujekwe OE,  
416 et al. Examining appropriate diagnosis and treatment of malaria : availability and use of  
417 rapid diagnostic tests and artemisinin-based combination therapy in public and private  
418 health facilities in south east Nigeria. 2010;1–9.
- 419 25. Bamiselu OF, Ajayi I, Fawole O, Dairo D, Ajumobi O, Oladimeji A, et al. Adherence to  
420 malaria diagnosis and treatment guidelines among healthcare workers in Ogun State,  
421 Nigeria. BMC Public Health. 2016;16(1).
- 422 26. Bawate C, Callender-Carter ST, Nsajju B, Bwayo D. Factors affecting adherence to  
423 national malaria treatment guidelines in management of malaria among public healthcare  
424 workers in Kamuli District, Uganda. Malar J [Internet]. 2016;15(1):112. Available from:  
425 [http://www.scopus.com/inward/record.url?eid=2-s2.0-](http://www.scopus.com/inward/record.url?eid=2-s2.0-84959185453&partnerID=tZOtx3y1)  
426 [84959185453&partnerID=tZOtx3y1](http://www.scopus.com/inward/record.url?eid=2-s2.0-84959185453&partnerID=tZOtx3y1)
- 427 27. Albertini A. Preliminary enquiry into the availability , price and quality of malaria rapid  
428 diagnostic tests in the private health sector of ... 2011;(November 2014).
- 429 28. Moonasar D, Goga AE, Freaun J, Kruger P, Chandramohan D. An exploratory study of  
430 factors that affect the performance and usage of rapid diagnostic tests for malaria in the  
431 Limpopo Province ,. 2007;5:1–5.
- 432 29. Harvey SA, Jennings L, Chinyama M, Masaninga F, Mulholland K, Bell DR. Improving  
433 community health worker use of malaria rapid. 2008;12(group 1):1–12.
- 434 30. Counihan H, Harvey SA, Sekeseke-chinyama M, Hamainza B, Banda R, Malambo T, et  
435 al. Community Health Workers Use Malaria Rapid Diagnostic Tests ( RDTs ) Safely and  
436 Accurately : Results of a Longitudinal Study in Zambia. 2012;87(1):57–63.
- 437
